# Supplementary material
Source: PubMed Central journal article supplement (PMC5501749)
Supplement: NIHMS864995-supplement.pdf [file NIHMS864995-supplement.pdf]

Figure S1

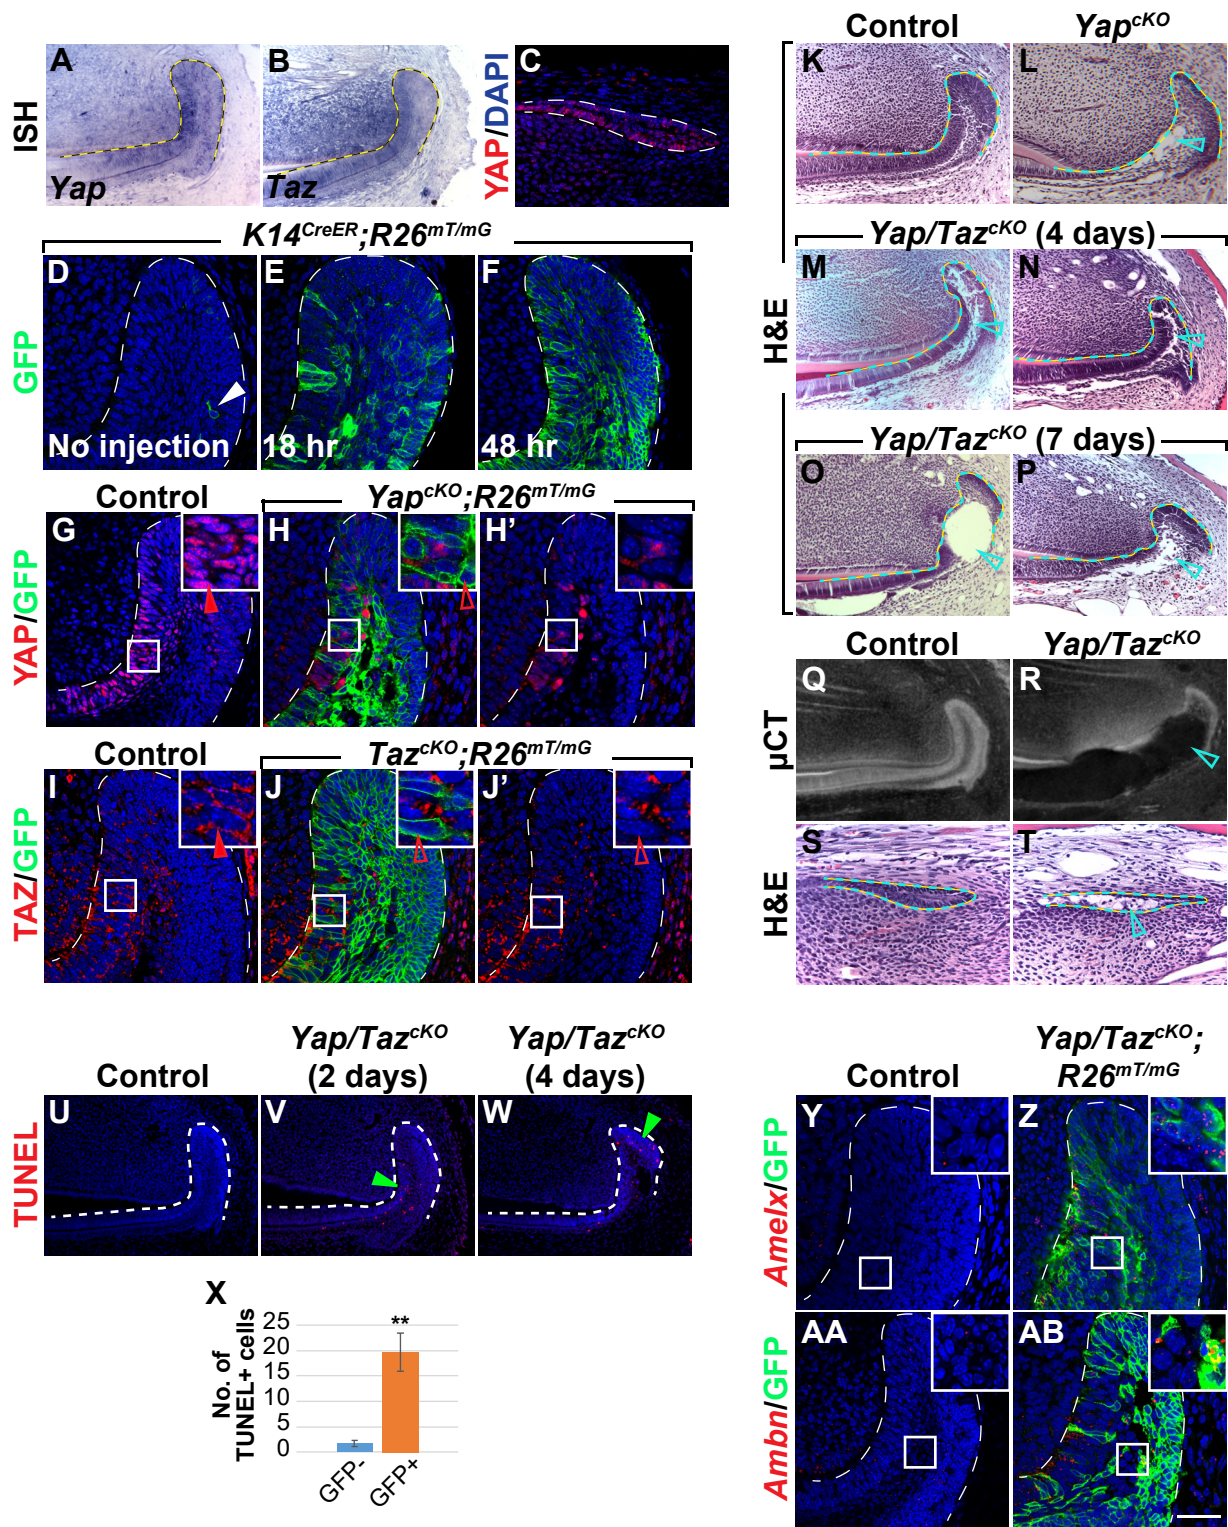

**Figure S1. Expression of *Yap/Taz* and their functions. (related to Figures 1 and 2)**

(A and B) *Yap* and *Taz* *in situ* hybridization.

(C) YAP immunostaining in the lingual CL (liCL).

(D-F) K14CreER activity in uninduced laCLs (D) and in tamoxifen-induced laCLs at 18 and 48 hours post injection (E and F), as indicated by the expression of the Cre-responsive reporter allele, *R26<sup>mT/mG</sup>*. White arrowhead in (D) marks the occasional GFP-positive cells due to CreER leakage in uninduced laCLs.

(G-J') K14CreER ablates YAP and TAZ effectively. Closed and open red arrowheads, respectively, mark normal and reduced immunostaining. GFP labels Cre active cells.

(K and L) 3 out of 12 *Yap<sup>cKO</sup>* samples exhibit tissue loss in the laCL (open cyan arrowhead) one week after Cre induction.

(M and N) 4 days after Cre induction, TA and SR regions begin to disintegrate in *Yap/Taz<sup>cKO</sup>* laCLs (open cyan arrowheads).

(O and P) 7 days after Cre induction, a large hole develops in *Yap/Taz<sup>cKO</sup>* laCLs (open cyan arrowheads).

(Q and R)  $\mu$ CT analysis confirms that one week after Cre induction, a large hole is formed in the *Yap/Taz<sup>cKO</sup>* dental epithelium (open cyan arrowhead in R).

(S and T) liCL similarly disintegrates in the absence of *Yap/Taz* (open cyan arrowhead).

(U-W) Time course of TUNEL staining in *Yap/Taz<sup>cKO</sup>* laCLs. Green arrowheads mark increased TUNEL signals.

(X) Quantification of number of TUNEL+ cells in GFP+ and GFP- population in *Yap/Taz<sup>cKO</sup>*.

(Y-AB) GFP immunostaining and fluorescent *in situ* hybridization of *Amelx* and *Ambn* show increased *Amelx* and *Ambn* transcripts in Cre-recombined *Yap/Taz<sup>cKO</sup>* cells.

Representative images are shown. Dashed lines outline the dental epithelium. Scale bar in AB represents 130  $\mu$ m in (A, B, K-R, and U-W) and 50  $\mu$ m in (C-J', S, T, and Y-AB).

**Figure S2**

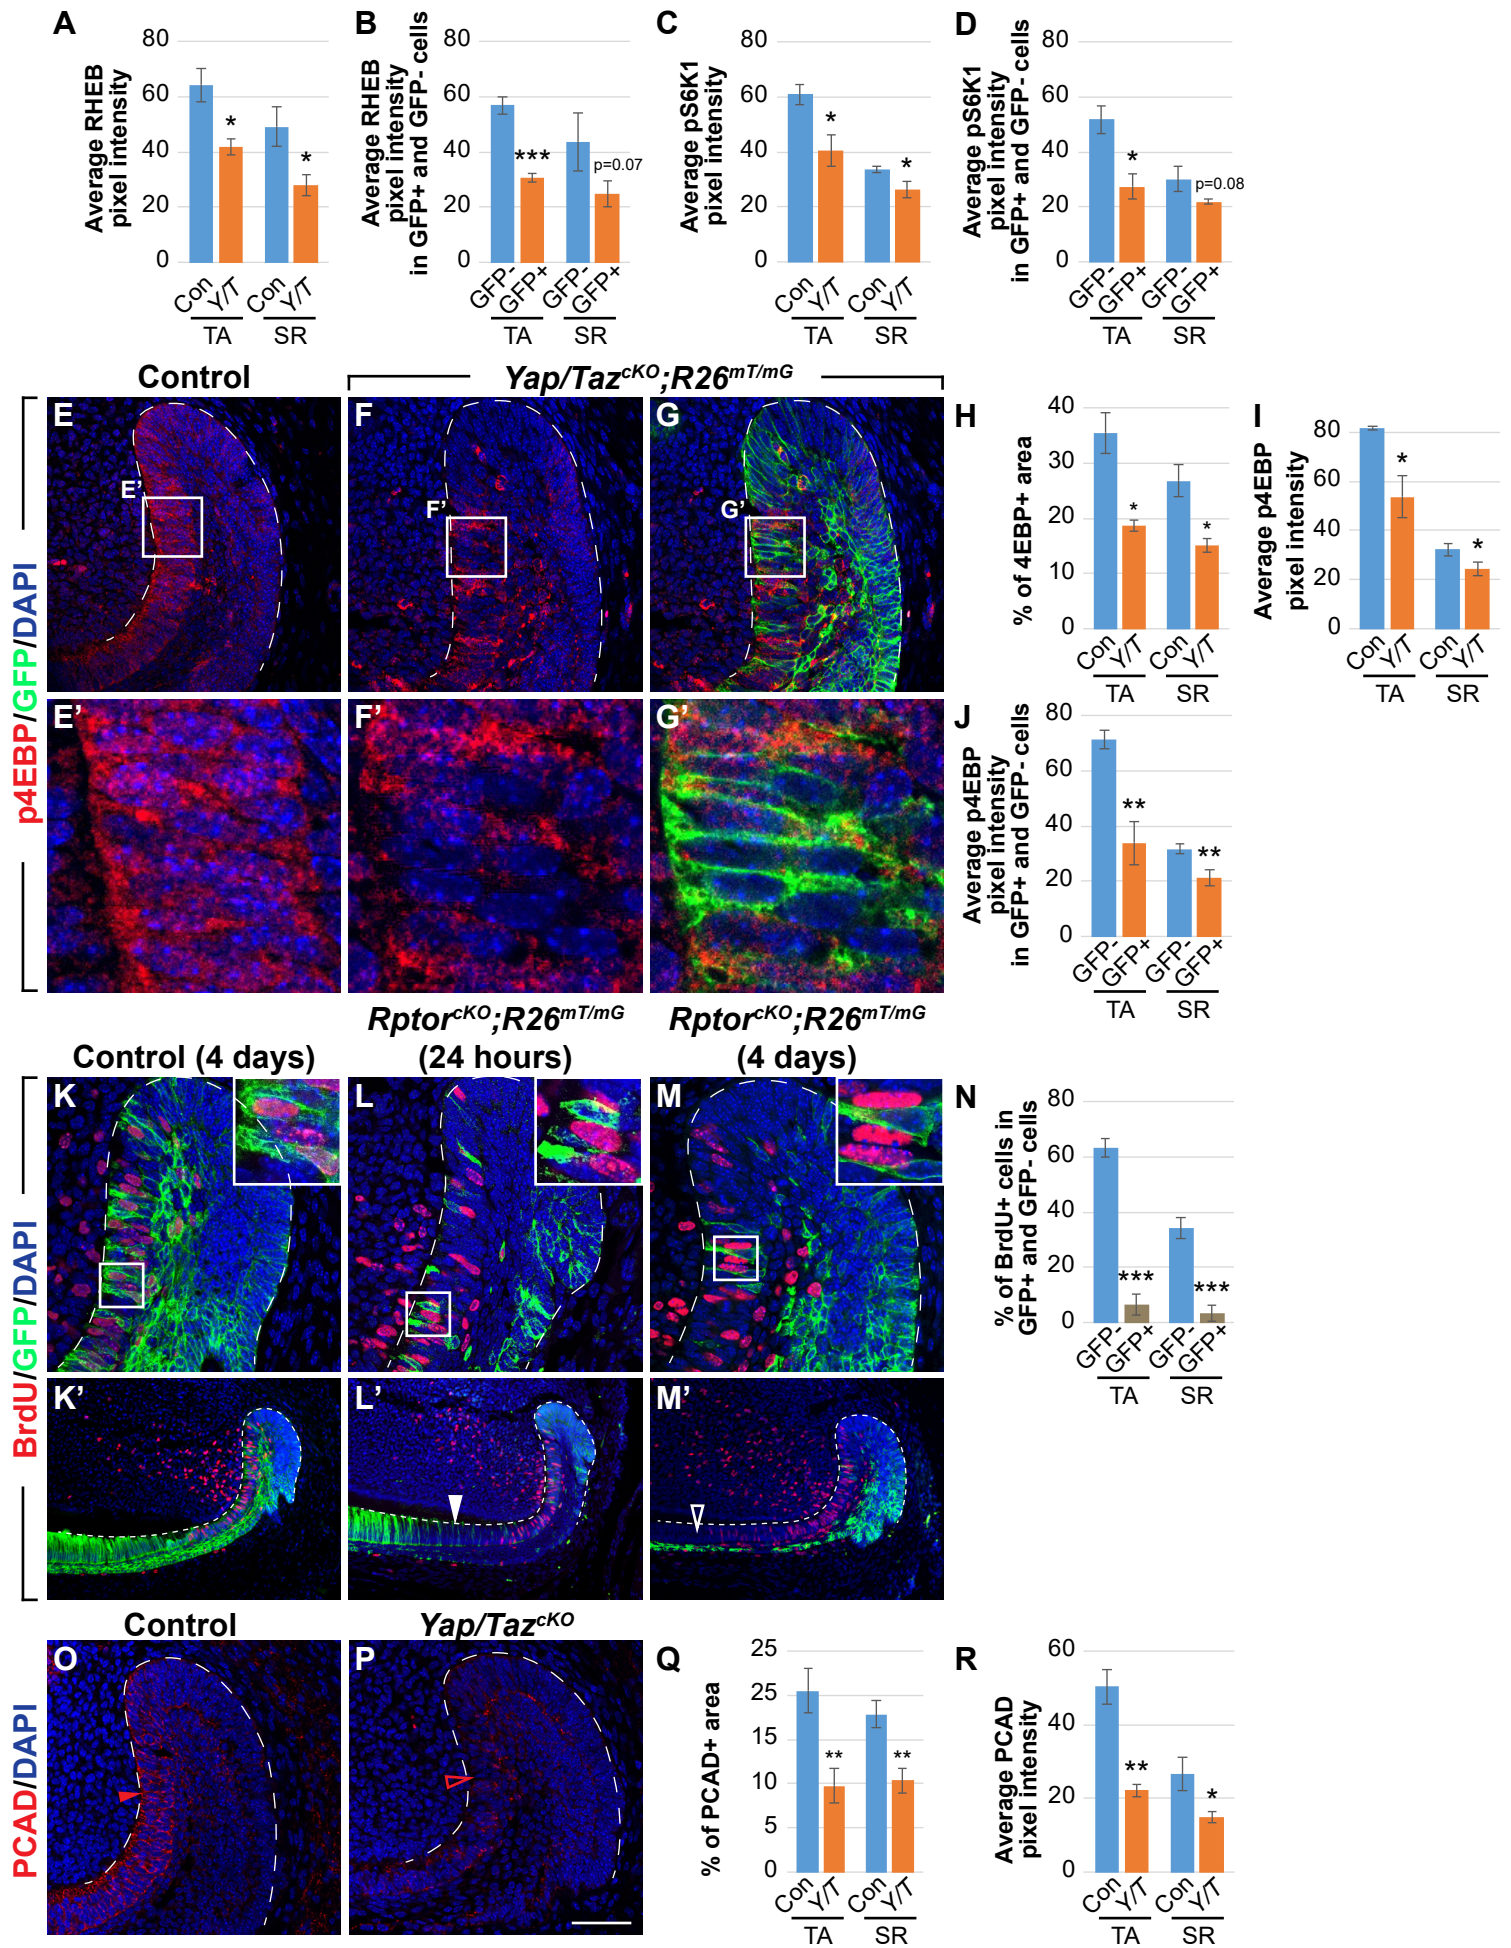

**Figure S2. Gene expression and mTOR signaling downstream of YAP/TAZ. (related to Figure 3)**

(A-D) Average pixel intensity of RHEB and pS6K1 immunostaining between control and *Yap/Taz<sup>CKO</sup>* laCLs (A and C) and average pixel intensity of RHEB and pS6K1 immunostaining between Cre-recombined (GFP+) and non-recombined (GFP-) cells in *Yap/Taz<sup>CKO</sup>* laCLs (B and D) are compared.

(E-J) p4EBP is normally expressed in TA and inner SR cells (E and E') but downregulated when *Yap* and *Taz* are deleted (F-G'). The percentage of p4EBP positive area in TA and inner SR regions (H), average pixel intensity of p4EBP immunostaining between control and *Yap/Taz<sup>CKO</sup>* laCLs (I), and average pixel intensity of p4EBP immunostaining between Cre-recombined (GFP+) and non-recombined (GFP-) cells in *Yap/Taz<sup>CKO</sup>* laCLs (J) are quantified.

(K-N) BrdU labeling and GFP lineage tracing in *Rptor<sup>CKO</sup>* laCLs reveals the absolute requirement for *Rptor* in expanding dental progenitor cells. GFP-positive Cre-recombined cells are mostly non-proliferative; this is quantified in (N). Closed white arrowhead in L' marks the proximal boundary of Cre-positive cells and open white arrowhead in M' marks the dramatic loss of GFP+ *Rptor*-deleted progeny in *Rptor<sup>CKO</sup>* laCLs.

(O-R) P-Cadherin (PCAD) is reduced in *Yap/Taz<sup>CKO</sup>* TA and inner SR cells (open red arrowhead in P) when compared to the control (red arrowhead in O). The corresponding quantification is shown in (Q and R).

Representative images and quantitative data are shown. Dashed lines outline laCLs. Scale bar in P represents 50  $\mu\text{m}$  in (E-G, K-M, O and P), 9.76  $\mu\text{m}$  in (E'-G'), and 130  $\mu\text{m}$  in (K'-M'). All data are presented as mean  $\pm$  SD. \* $p < 0.05$ ; \*\* $p < 0.01$ ; \*\*\* $p < 0.001$ .

Figure S3

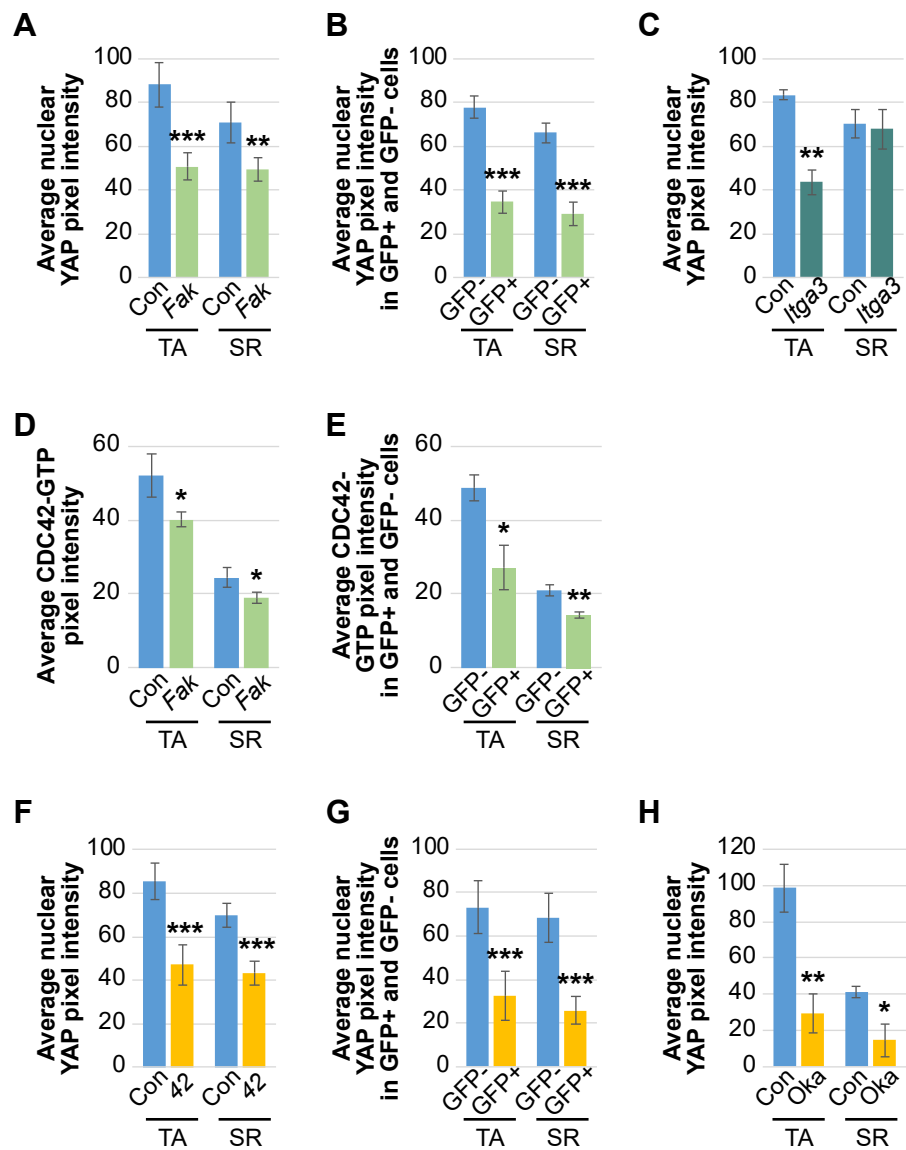

**Figure S3. Quantification of YAP and CDC42-GTP immunostaining. (related to Figures 4,5, and 6)**

(A and B) Average pixel intensity of nuclear YAP between control and *Fak<sup>ckO</sup>* laCLs (A) and average pixel intensity of nuclear YAP between Cre-recombined (GFP+) and non-recombined (GFP-) cells in *Fak<sup>ckO</sup>* laCLs (B) are compared.

(C) Average pixel intensity of nuclear YAP in control and *Itga3<sup>ckO</sup>* laCLs is quantified.

(D and E) Average pixel intensity of CDC42-GFP between control and *Fak<sup>ckO</sup>* laCLs (D) and average pixel intensity of CDC42-GFP between Cre-recombined (GFP+) and non-recombined (GFP-) cells in *Fak<sup>ckO</sup>* laCLs (E) are compared.

(F and G) Average pixel intensity of nuclear YAP between control and *Cdc42<sup>ckO</sup>* laCLs (F) and average pixel intensity of nuclear YAP between Cre-recombined (GFP+) and non-recombined (GFP-) cells in *Cdc42<sup>ckO</sup>* laCLs (G) are compared.

(H) Average pixel intensity of nuclear YAP in control and okadaic acid-treated laCLs is quantified.

All data are presented as mean  $\pm$  SD. \*p<0.05; \*\*p<0.01; \*\*\*p<0.001.

Figure S4

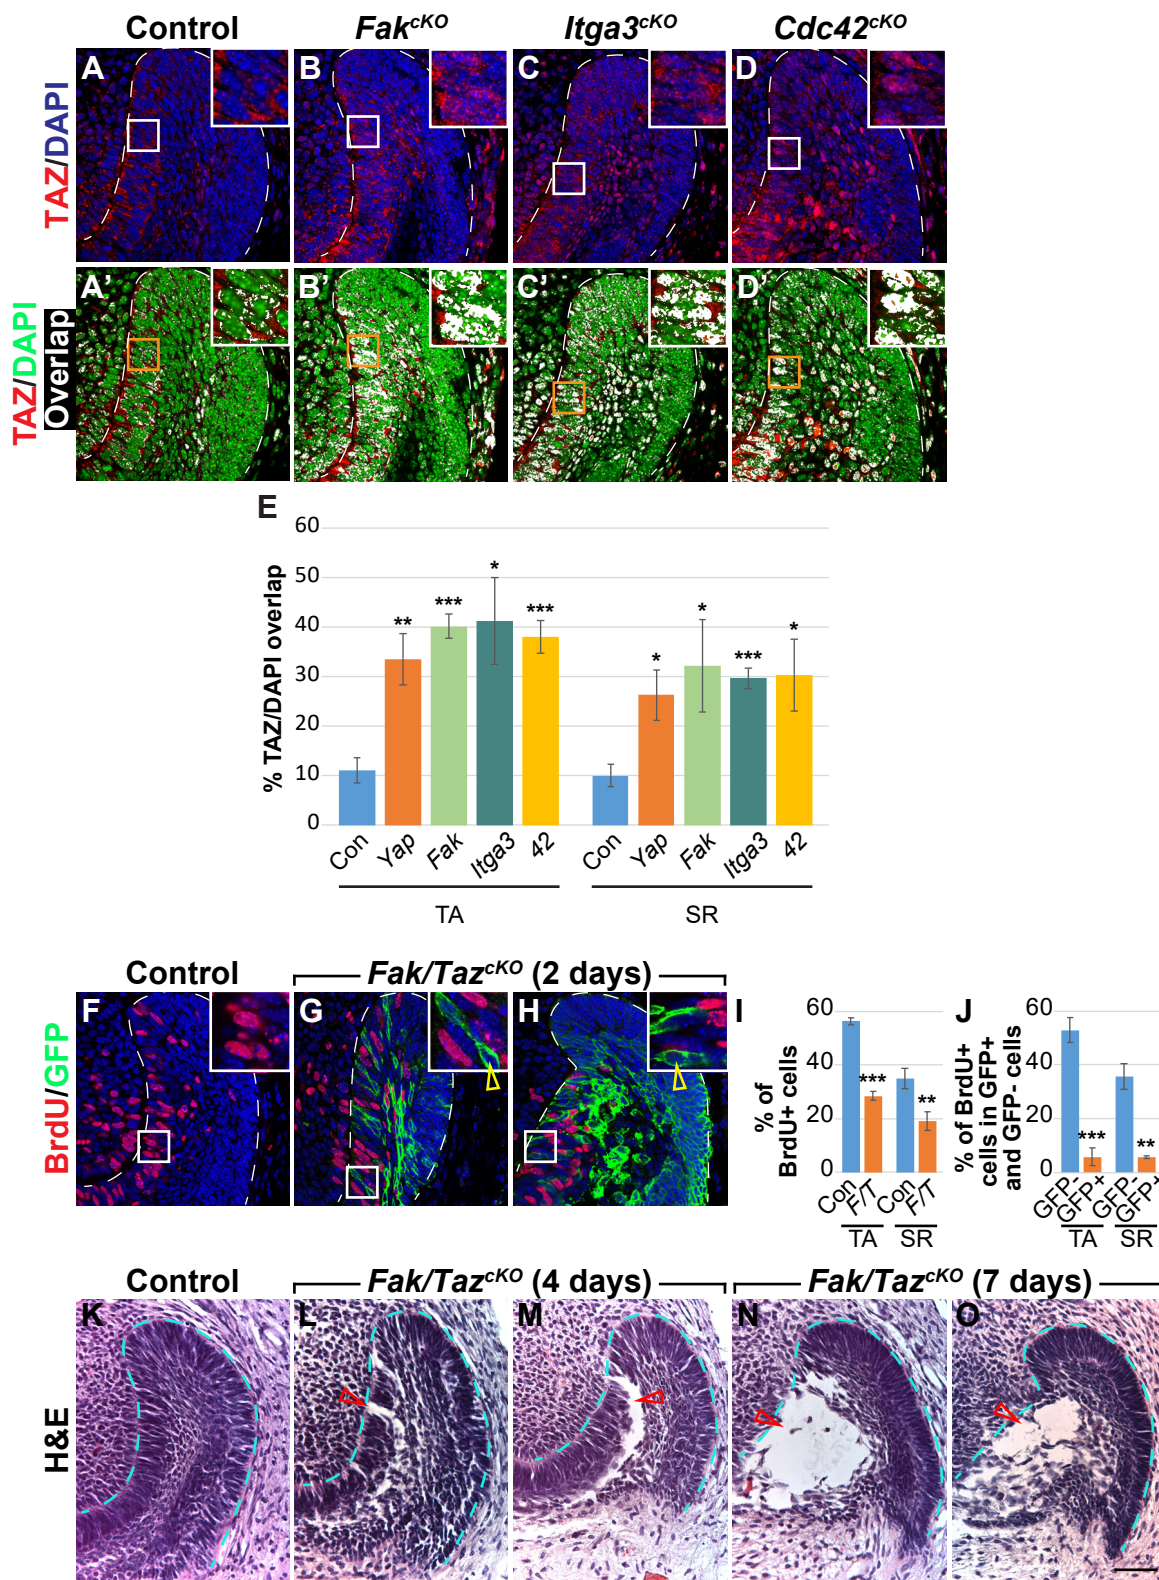

**Figure S4. Expression of TAZ in different mutants. (related to Figures 4 and 5)**

(A-D') TAZ is normally restricted in the cytoplasm in the laCL (A and A') but translocates to the nucleus in *Fak<sup>CKO</sup>* (B and B'), *Itga3<sup>CKO</sup>* (C and C'), and *Cdc42<sup>CKO</sup>* (D and D') mutant laCLs.

(E) Quantification of TAZ/DAPI overlap in mutant laCLs.

(F-J) BrdU labeling in control and *Fak/Taz<sup>CKO</sup>* laCLs (F-H). Open yellow arrowheads in (G and H) mark non-proliferative Cre-recombined GFP+ cells. Quantification is made by calculating the percentage of BrdU-positive (+) cells per section in control and *Fak/Taz<sup>CKO</sup>* laCLs (I) and by comparing the percentage of BrdU+ cells between Cre-recombined (GFP+) and non-recombined (GFP-) cells in mutant laCLs (J).

(K-O) H&E staining of control and *Fak/Taz<sup>CKO</sup>* laCLs at different timepoints. Open red arrowheads mark tissue loss in the mutants.

Representative images and quantitative data are shown. Dashed lines outline laCLs. Scale bar in O represents 50  $\mu$ m in (A-D', F-H, and K-O). Quantitative data are presented as mean  $\pm$  SD.

\*p<0.05; \*\*p<0.01; \*\*\*p<0.001.



Figure S5

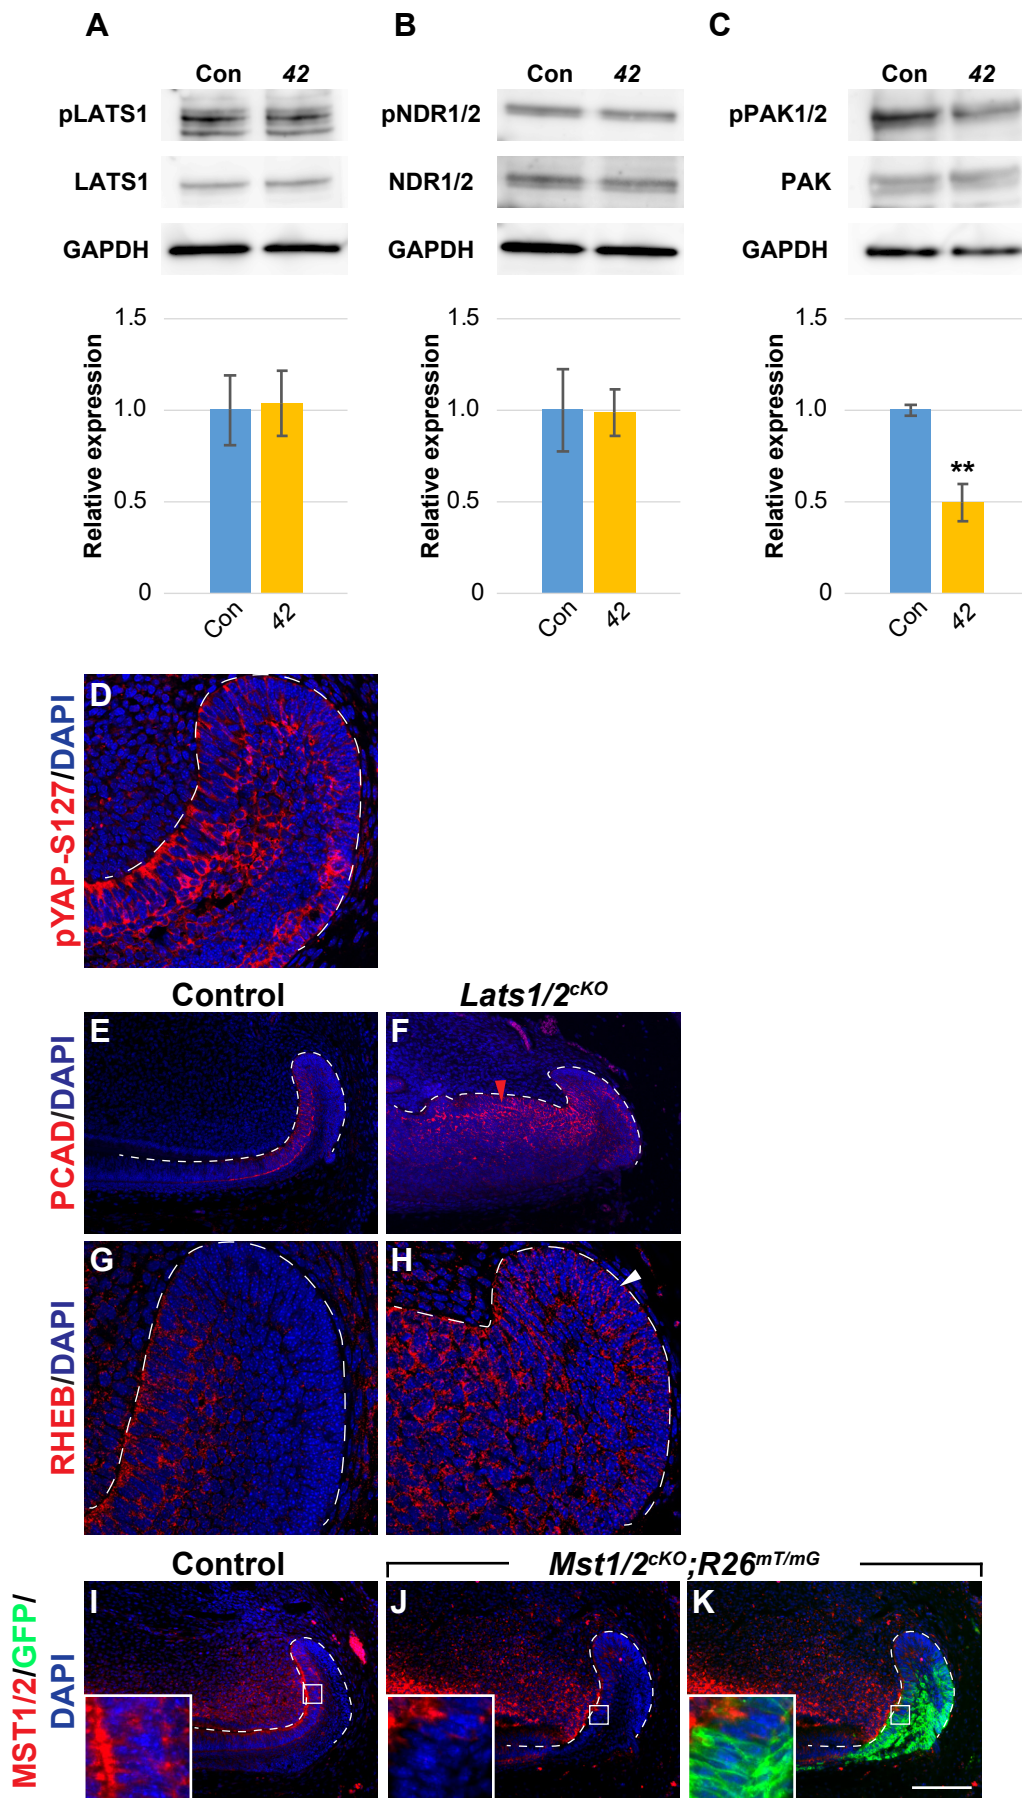

**Figure S5. LATS1/2, but not MST1/2, function in parallel to CDC42. (related to Figure 6 and 7)**

(A and B) Western blot analysis and corresponding quantification show that levels of pLATS1 and pNDR1/2 remain unchanged in *Cdc42<sup>ckO</sup>* laCLs.

(C) pPAK1/2 level is decreased in *Cdc42<sup>ckO</sup>* laCLs.

(D) Immunostaining of pYAP-S127 in laCLs.

(E and F) Deletion of *Lats1/2* results in expansion of the TA region, which can be marked by PCAD (red arrowhead in F).

(G and H) RHEB expression is upregulated in the OEE region of *Lats1/2<sup>ckO</sup>* laCLs (white arrowhead).

(I-K) MST1/2 expression in control and *Mst1/2<sup>ckO</sup>* laCLs. GFP marks cells that have undergone Cre recombination.

Representative images, cropped blots and quantitative data are shown. Dashed lines outline the dental epithelium. Scale bar in K represents 50  $\mu\text{m}$  in (D, G, and H) and 130  $\mu\text{m}$  in (E, F, and I-K). Quantitative data are presented as mean  $\pm$  SD. \*\* $p < 0.01$

Figure S6

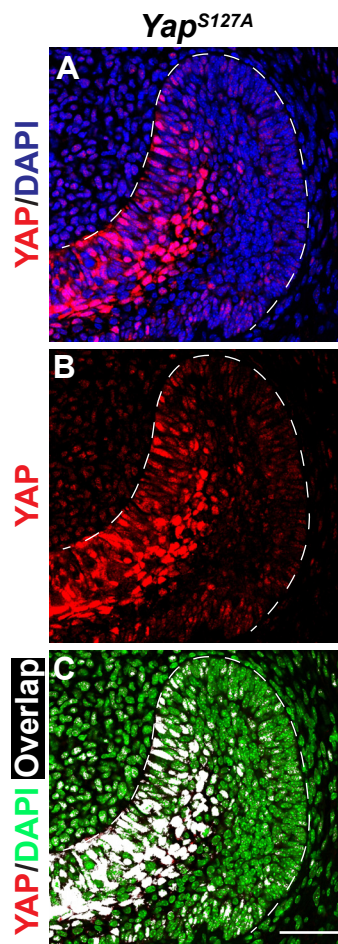

**Figure S6. Overexpression of *Yap*<sup>S127A</sup>. (related to Figures 6)**

(A-C) Overexpression of *Yap*<sup>S127A</sup> does not effectively drive nuclear YAP in the OEE.

Representative images are shown. Dashed lines outline IaCLs. Scale bar in (C) represents 50  $\mu\text{m}$  in (A-C).

**Table S1.** Gene Set Enrichment Analysis (GSEA) results for downregulated genes. Related to Figure 2.

| Name                              | Size | ES         | NES       | Nom P-Val   | FDR Q-Val  | FWER P-Val |
|-----------------------------------|------|------------|-----------|-------------|------------|------------|
| Mitotic Spindle                   | 45   | 0.3849198  | 1.9285586 | 0.002074689 | 0.08329048 | 0.079      |
| Mtorc1 Signaling                  | 41   | 0.37824142 | 1.877489  | 0.00533049  | 0.0646663  | 0.119      |
| Xenobiotic Metabolism             | 27   | 0.40863594 | 1.7669948 | 0.007650273 | 0.12305588 | 0.297      |
| Estrogen Response Late            | 21   | 0.40807262 | 1.6800778 | 0.02027027  | 0.1707811  | 0.484      |
| Epithelial Mesenchymal Transition | 32   | 0.35450116 | 1.6387851 | 0.027262814 | 0.17580047 | 0.566      |
| Oxidative Phosphorylation         | 32   | 0.3431483  | 1.5768838 | 0.04849138  | 0.22019507 | 0.724      |
| Myc Targets V1                    | 51   | 0.30922395 | 1.5741473 | 0.03305785  | 0.19229464 | 0.729      |
| E2f Targets                       | 48   | 0.30326316 | 1.54611   | 0.045454547 | 0.19782263 | 0.778      |
| G2m Checkpoint                    | 44   | 0.31142673 | 1.5308156 | 0.061458334 | 0.19116285 | 0.802      |

ES, enrichment score; NES, normalized enrichment score; Nom P-Val, nominal p-value; FDR Q-Val, false discovery rate q-value; FWER, familywise-error rate.

**Table S2.** Chemical concentrations and culture time. Related to Figures 3, 4, and 6, and STAR Methods.

| <b>Experiments</b>                                                 | <b>Chemicals</b>                     | <b>Targets</b>                              | <b>Working concentration</b> | <b>Culture time</b> |
|--------------------------------------------------------------------|--------------------------------------|---------------------------------------------|------------------------------|---------------------|
| <b>Functional test of mTOR signaling in laCLs (Figures 3N-3P)</b>  | Rapamycin                            | mTORC1                                      | 1 $\mu$ M                    | 24 hours            |
| <b>Screening upstream regulators of YAP (Figures 4A-4F)</b>        | (-)-Blebbistatin                     | Non-muscle myosin II                        | 50 $\mu$ M                   | 24 hours            |
|                                                                    | Erlotinib HCl                        | EGFR                                        | 10 $\mu$ M                   | 24 hours            |
|                                                                    | Ki16425                              | LPA receptor                                | 10 $\mu$ M                   | 24 hours            |
|                                                                    | Latrunculin A, Latrunculia magnifica | Actin polymerization                        | 0.5 $\mu$ M                  | 24 hours            |
|                                                                    | PF-573228                            | Focal adhesion kinase (FAK)                 | 5 $\mu$ M                    | 24 hours            |
|                                                                    | PP2                                  | SRC kinase                                  | 20 $\mu$ M                   | 24 hours            |
|                                                                    | Y-27632                              | Rho-associated protein kinase (ROCK)        | 50 $\mu$ M                   | 24 hours            |
| <b>Functional test of PP1A in YAP localization (Figures 6K-6M)</b> | Okadaic acid, Prorocentrum sp.       | Protein phosphatase 1 and 2A (PP1 and PP2A) | 0.05 $\mu$ M                 | 12 hours            |

**Table S3.** Primer sequences. Related to STAR Methods.

| <b>Target</b>              | <b>Forward</b>                      | <b>Reverse</b>                                |
|----------------------------|-------------------------------------|-----------------------------------------------|
| <b>Genotyping</b>          |                                     |                                               |
| <i>Cdc42</i>               | ATGTAGTGTCTGTCCATTGG                | TCTGCCATCTACACATACAC                          |
| <i>Cre</i>                 | GCAAAACAGGCTCTAGCGTTTCG             | CTGTTTCACTATCCAGGTTACGG                       |
| <i>dnRock2</i>             | ACTCATCTCAGAAGAGGATCTG              | TTAGCTTGGCTTGTGGAGC                           |
| <i>Fak</i>                 | GAGAATCCAGCTTTGGCTGTT               | GAATGCTACAGGAACCAATAAC                        |
| <i>Itga3</i>               | TGATGACTATACCAACCGGAC               | ACTCCAAGCCACATATCCTC                          |
| <i>Lats1</i>               | TTGTTGCTGGTGTGTTTCC                 | ATGAATGAACCTGAGGCTGC                          |
| <i>Lats2</i>               | ATCCTAGCACTCAGGAGGCA                | ACACATTCCCCTCCACTGAC                          |
| <i>Mst1</i>                | CCTGCTTCAGTGTGGCTCTTGATTTCT<br>CT   | TAGACCAGCCAGGGCTAGAGTGAAACC<br>TTG            |
| <i>Mst2</i>                | GTTCAGGGTCCCACCAAGAGTCGCTTC<br>ATT  | TGTCTAGCTGCTGATGACACTGAACTT<br>CTGGC          |
| <i>R26<sup>mT/mG</sup></i> | CTCTGCTGCCTCCTGGCTTCT               | CGAGGCGGATCACAAGCAATA                         |
| <i>R26-rtTA</i>            | AAAGTCGCTCTGAGTTGTTAT               | GCGAAGAGTTTGCCTCAACC<br>GGAGCGGGAGAAATGGATATG |
| <i>Rac1</i>                | TCCAATCTGTGCTGCCCATC                | GATGCTTCTAGGGGTGAGCC                          |
| <i>RhoA</i>                | AGCCAGCCTCTTGACCGATTTA              | TGTGGGATACCGTTTGAGCAT                         |
| <i>Rptor</i>               | CTCAGTAGTGGTATGTGCTCAG              | GGGTACAGTATGTCAGCACAG                         |
| <i>Taz</i>                 | CCCACAGTTAAATGCTTCTCCCAAGAC<br>TGGG | GGCTTGTGACAAAGAACCTGGGGCTAT<br>CTGAG          |
| <i>Yap</i>                 | ACATGTAGGTCTGCATGCCAGAGGAGG         | AGGCTGAGACAGGAGGATCTCTGTGAG                   |
| <i>Yap<sup>S127A</sup></i> | CCCTCCATGTGTGACCAAGG                | GCACAGCATTGCGGACATGC                          |
|                            | GCAGAAGCGCGGCCGTCTGG                |                                               |
| <b>qPCR</b>                |                                     |                                               |
| <i>Ambn</i>                | GAGCTGATAGCACCAGATGAG               | CGGTTGGAAATTGTGGATCAG                         |
| <i>Amelx</i>               | GCATACACTCAAAGAACCATCAAG            | CACCTCATAGCTTAAGTTGATATAACC                   |
| <i>Cdh3</i>                | CTTGATGCCAACGATAACGC                | ACTGTCAGCCTCTGTACCTC                          |
| <i>Ppia</i>                | CAAACACAAACGGTTCCAG                 | TTCACCTTCCCAAGACCAC                           |
| <i>Rheb</i>                | GCAGATACCTATTATGTTGGTTGG            | AGCAGTTTGATTTTCTTTAGCAGA                      |
| <i>Yap</i>                 | CAGACGCTGATGAATTCTGC                | GGATGTGGTCTTGTCTTATGGT.                       |

**Table S4.** Antibody sources and concentrations. Related to STAR Methods.

| Primary antibodies         | Sources                | Dilutions | Secondary antibodies used          |
|----------------------------|------------------------|-----------|------------------------------------|
| <b>Immunostaining</b>      |                        |           |                                    |
| Ameloblastin               | Santa Cruz (sc-50534)  | 1:100     | Goat anti-rabbit 555 (1:500)       |
| Amelogenin                 | Santa Cruz (sc-32892)  | 1:100     | Goat anti-rabbit 555 (1:500)       |
| BrdU                       | Abcam (ab6326)         | 1:200     | Goat anti-rat 555 (1:500)          |
| CDC42-GTP                  | NewEast (26905)        | 1:50      | Biotinylated anti-mouse (1:1000)   |
| GFP                        | Abcam (ab13970)        | 1:500     | Goat anti-chick 488 (1:500)        |
| ITGA3                      | Aggarwal et al., 2014  | 1:100     | Biotinylated anti-rabbit (1:1000)  |
| Ki67                       | Thermo (RM-9106)       | 1:100     | Goat anti-rabbit 555 (1:500)       |
| p4EBP                      | Cell Signaling (2855)  | 1:100     | Biotinylated anti-rabbit (1:1000)  |
| P-cadherin                 | Thermo (135800)        | 1:200     | Biotinylated anti-mouse (1:1000)   |
| pFAK                       | Assay Biotech (A0925)  | 1:100     | Biotinylated anti-rabbit (1:1000)  |
| pMerlin                    | Rockland (600-401-414) | 1:100     | Biotinylated anti-rabbit (1:1000)  |
| pS6K1                      | Assay Biotech (A0533)  | 1:100     | Biotinylated anti-rabbit (1:1000)  |
| pSRC                       | Signalway (11091)      | 1:100     | Biotinylated anti-rabbit (1:1000)  |
| pYAP-S127                  | Cell Signaling (4911)  | 1:100     | Biotinylated anti-rabbit (1:1000)  |
| RHEB                       | ProSci (3501)          | 1:50      | Biotinylated anti-rabbit (1:1000)  |
| SerpinH1                   | ABclonal (A-2517)      | 1:100     | Biotinylated anti-rabbit (1:1000)  |
| TAZ                        | Sigma (HPA007415)      | 1:100     | Biotinylated anti-rabbit (1:1000)  |
| YAP                        | Cell Signaling (4912)  | 1:100     | Biotinylated anti-rabbit (1:1000)  |
| YAP (human)                | Abcam (ab52771)        | 1:100     | Goat anti-rabbit 555 (1:500)       |
| <b>Western Blot</b>        |                        |           |                                    |
| 4EBP                       | Cell Signaling (4923)  | 1:500     | Anti-rabbit HRP (1000)             |
| Ameloblastin               | Santa Cruz (sc-50534)  | 1:300     | Anti-rabbit HRP (1000)             |
| Amelogenin                 | Santa Cruz (sc-32892)  | 1:300     | Anti-rabbit HRP (1000)             |
| CDC42                      | Santa Cruz (sc-87)     | 1:300     | TrueBlot anti-rabbit, HRP (1:1000) |
| GAPDH                      | Acris (ACR001P)        | 1:3000    | Anti-mouse HRP (1000)              |
| Merlin                     | Cell Signaling (12888) | 1:500     | Anti-rabbit HRP (1000)             |
| NDR1                       | Santa Cruz (sc-46184)  | 1:300     | Anti-goat HRP (1000)               |
| p4EBP                      | Cell Signaling (2855)  | 1:500     | Anti-rabbit HRP (1000)             |
| PAK1/2/3                   | Cell Signaling (2604)  | 1:500     | Anti-rabbit HRP (1000)             |
| pLATS-T1079                | Bioss (bs-7913R)       | 1:500     | Anti-rabbit HRP (1000)             |
| pMerlin                    | Cell Signaling (13281) | 1:500     | Anti-rabbit HRP (1000)             |
| pNDR1/2                    | Biorbyt (orb335842)    | 1:500     | Anti-rabbit HRP (1000)             |
| PP1                        | Santa Cruz (sc-7482)   | 1:300     | TrueBlot anti-mouse, HRP (1:1000)  |
| PP2A                       | Santa Cruz (sc-6110)   | 1:300     | SmartBlot anti-goat, HRP (1:1000)  |
| pPAK1-S423                 | Cell Signaling (2601)  | 1:500     | Anti-rabbit HRP (1000)             |
| pS6K1                      | Cell Signaling (9205)  | 1:1000    | Anti-rabbit HRP (1000)             |
| pYAP-S127                  | Cell Signaling (13008) | 1:500     | Anti-rabbit HRP (1000)             |
| pYAP-S397                  | Cell Signaling (13619) | 1:500     | Anti-rabbit HRP (1000)             |
| S6K1                       | Cell Signaling (2708)  | 1:500     | Anti-rabbit HRP (1000)             |
| <b>Immunoprecipitation</b> |                        |           |                                    |
| CDC42-GTP                  | NewEast (26905)        | 1.5 µg/IP | n/a                                |
| YAP (63.7)                 | Santa Cruz (sc-101199) | 2 µg/IP   | n/a                                |



**Table S5.** Numbers of samples used for quantification. Related to STAR Methods.

| <b>Experiments</b>                                         | <b>Sample origins</b>                     | <b>N numbers</b>                                                                                                                                                                                                               |
|------------------------------------------------------------|-------------------------------------------|--------------------------------------------------------------------------------------------------------------------------------------------------------------------------------------------------------------------------------|
| Colony formation assay                                     | Control and <i>Yap/Taz</i> <sup>ckO</sup> | 3 experiments performed with 4 laCLs from 2 animals used per experiment                                                                                                                                                        |
| BrdU labeling                                              | Control and <i>Yap/Taz</i> <sup>ckO</sup> | 3 animals per genotype, with the middle 3 sections used for each laCL                                                                                                                                                          |
|                                                            | Control and <i>Rptor</i> <sup>ckO</sup>   | 3 animals per genotype                                                                                                                                                                                                         |
|                                                            | Control and <i>Fak/Taz</i> <sup>ckO</sup> | 3 animals per genotype                                                                                                                                                                                                         |
| Ki67 staining                                              | Control and Rapamycin treated             | 3 laCLs per condition, with the middle 3 sections used for each laCL                                                                                                                                                           |
| TUNEL                                                      | Control and <i>Yap/Taz</i> <sup>ckO</sup> | 3 animals per genotype                                                                                                                                                                                                         |
| Microarray                                                 | Control and <i>Yap/Taz</i> <sup>ckO</sup> | 3 experiments with 8 laCLs from 2 males and 2 females per genotype in each experiment                                                                                                                                          |
| qPCR                                                       | Control and <i>Yap/Taz</i> <sup>ckO</sup> | 6 experiments with 1 animal used per genotype in each experiment                                                                                                                                                               |
| YAP immunostaining                                         | Control and <i>Fak</i> <sup>ckO</sup>     | 6 animals per genotype                                                                                                                                                                                                         |
|                                                            | Control and <i>Itga3</i> <sup>ckO</sup>   | 3 animals per genotype                                                                                                                                                                                                         |
|                                                            | Control and <i>Cdc42</i> <sup>ckO</sup>   | 6 animals per genotype                                                                                                                                                                                                         |
|                                                            | Control and Okadaic acid treated          | 3 laCLs per condition                                                                                                                                                                                                          |
|                                                            | Electroporated samples                    | 135 cells from 9 laCLs for <i>Yap</i> ; 166 cells from 13 laCLs for <i>Yap</i> <sup>S127A</sup> ; 161 cells from 11 laCLs for <i>Yap</i> <sup>S397A</sup> ; and 128 cells from 9 laCLs for <i>hYap</i> <sup>S127A, S397A</sup> |
| TAZ immunostaining                                         | Control and <i>Fak</i> <sup>ckO</sup>     | 3 animals per genotype                                                                                                                                                                                                         |
|                                                            | Control and <i>Itga3</i> <sup>ckO</sup>   | 3 animals per genotype                                                                                                                                                                                                         |
|                                                            | Control and <i>Cdc42</i> <sup>ckO</sup>   | 3 animals per genotype                                                                                                                                                                                                         |
| Immunostaining for RHEB, pS6K1, p4EBP, CDC42-GFP, and PCAD | Control and mutants                       | 3 animals per genotype                                                                                                                                                                                                         |
| Immunoblotting                                             | Control and corresponding mutants         | 3 experiments with 7 animals used per genotype in each experiment                                                                                                                                                              |
| Co-immunoprecipitation                                     | Control and corresponding mutants         | 3 experiments with 14 animals used per genotype in each experiment                                                                                                                                                             |
